# Supplementary material for: Oxalate-bridging NdIII-based arsenotungstate with multifunctional NIR-luminescence and magnetic properties
Source: Royal Society of Chemistry journal article supplement (doi:10.1039/d2dt01066f), 2022-01-01
Supplement: d2dt01066f1.pdf [file d2dt01066f1.pdf]

Electronic Supporting Information

## Oxalate-Bridging Nd<sup>III</sup>-Based Arsenotungstate with Multifunctional NIR-luminescence and Magnetic Properties

Hanhan Chen, Lin Sun, Kangting Zheng, Jinpeng Zhang, Pengtao Ma,\* Jingping Wang,  
and Jingyang Niu\*

*Henan Key Laboratory of Polyoxometalate Chemistry, College of Chemistry and Chemical  
Engineering, Henan University, Kaifeng, Henan 475004, P. R. China*

Fax: +86-371-23886876; E-mail for Pengtao Ma: mpt@henu.edu.cn. and E-mail for Jingyang  
Niu: jyniu@henu.edu.cn.

### Figures

**Fig. S1.** The experimental and simulated PXRD patterns of **1** and **1@Y**.

**Fig. S2.** Ortep diagram of the asymmetric unit in the crystal structure of **1**. All the hydrogen atoms and some lattice water molecules are omitted for clarity.

**Fig. S3.** The polyhedron representation of the precursor [As<sub>2</sub>W<sub>19</sub>O<sub>67</sub>(H<sub>2</sub>O)]<sup>14-</sup> (left); the polyhedron representation of the variable [As<sub>2</sub>W<sub>19</sub>O<sub>67</sub>(H<sub>2</sub>O)]<sup>14-</sup> unit in **1** (right).

**Fig. S4.** IR spectra of **1** and **1@Y**.

**Fig. S5.** Raman spectra of **1** and K<sub>14</sub>[As<sub>2</sub>W<sub>19</sub>O<sub>67</sub>(H<sub>2</sub>O)].

**Fig. S6.** (a) (c) Raman spectra at different positions on the crystal of **1**. (b) The number represent the sampling point on the crystal of **1**.

**Fig. S7.** The emission spectrum of **1** by monitoring the excitation at 522 nm(a), 800 nm (b), and 860 nm (c), respectively.

**Fig. S8.** The luminescence decay curve of **1** by monitoring the emission at 1059 nm upon the excitation at 580 nm.

**Fig. S9.** The emission spectrum of K<sub>14</sub>[As<sub>2</sub>W<sub>19</sub>O<sub>67</sub>(H<sub>2</sub>O)] by monitoring the excitation at 580 nm.

**Fig. S10.** The emission spectrum of **1** by monitoring the excitation under 212, 220 and 228 nm, respectively.

**Fig. S11.** The schematic energy level diagram demonstrating the mismatch of the energy gap between <sup>3</sup>T<sub>1u</sub>→<sup>1</sup>A<sub>1g</sub> of {As<sub>2</sub>W<sub>19</sub>} components and <sup>4</sup>F<sub>3/2</sub>→<sup>4</sup>I<sub>J</sub> (J=13/2, 11/2, and 9/2) of Nd<sup>III</sup> cations in **1**. (dotted line denotes nonradiative transition, ET: energy transfer).

**Fig. S12.** Frequency dependence of χ<sub>M</sub>' (closed circles) and χ<sub>M</sub>'' (open circles) for **1** and **1@Y** measured under zero dc field at 2.0 K.

**Fig. S13.** Sweep field diagram of **1** from 500 to 5000 Oe, and the field-dependent relaxation time for **1** at 2.0 K.

**Fig. S14.** Sweep field diagram of **1** from 100 to 500 Oe at 2.0 K.

**Fig. S15.** Sweep field diagram of **1@Y** from 500 to 5000 Oe, and the field-dependent relaxation time for **1@Y** at 2.0 K.

**Fig. S16.** Hysteresis loop for **1**, collected at 2 K with a 500 Oe s<sup>-1</sup> sweep rate. Inset: expansion showing the very small coercivity (left top).

**Fig. S17.** TG curves of **1** and **1@Y**.

## Tables

**Table S1.** Crystallographic data and structure refinements for **1** and **1@Y**.

**Table S2.** BVS values for Nd, As, and W atoms in **1**.

**Table S3.** Possible geometries of eight coordinated metal centers.

**Table S4.** Deviation parameters calculated by SHAPE from each ideal polyhedron for Nd1.

**Table S5.** Selected bond angles (°) of **1**.

**Table S6.** Selected bond lengths (Å) of **1**.

**Table S7.** Calculated and found analyses of As, W, Nd and Y with massic ratios in **1** and **1@Y**.

**Table S8.** Relaxation fitting parameters from least-squares fitting of  $\chi(\omega)$  data of **1**.

**Table S9.** Relaxation fitting parameters from least-squares fitting of  $\chi(\omega)$  data of **1@Y**.

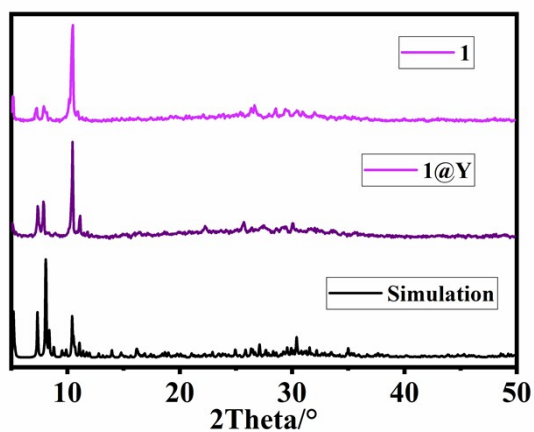

**Fig. S1.** The experimental and simulated PXRD patterns of **1** and **1@Y**.

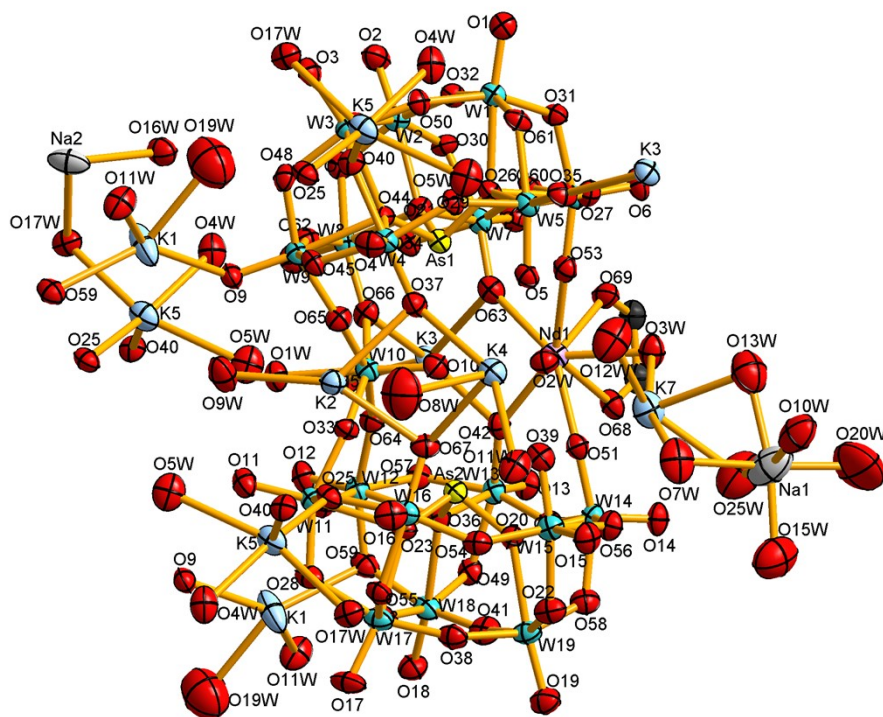

**Fig. S2.** Ortep diagram of the asymmetric unit in the crystal structure of **1**. All the hydrogen atoms and some lattice water molecules are omitted for clarity. (Colour code: W = aqua spheres; As = yellow spheres; Nd = lavender spheres; O = red spheres; C = dark gray spheres; K = pale blue spheres; Na = gray spheres).

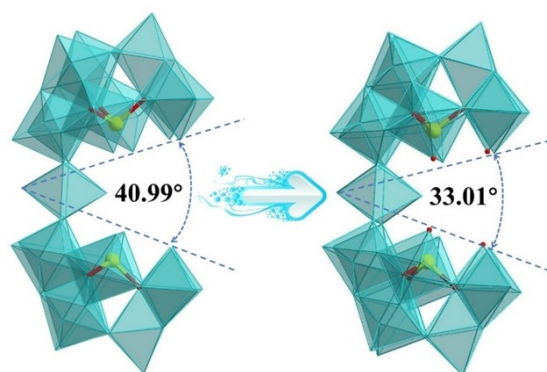

**Fig. S3.** The polyhedron representation of the precursor  $[\text{As}_2\text{W}_{19}\text{O}_{67}(\text{H}_2\text{O})]^{14-}$  (left); the polyhedron representation of the variable  $[\text{As}_2\text{W}_{19}\text{O}_{67}(\text{H}_2\text{O})]^{14-}$  unit in **1** (right).

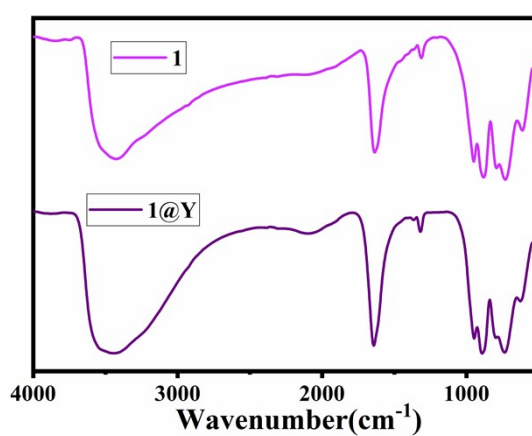

**Fig. S4.** IR spectra of **1** and **1@Y**.

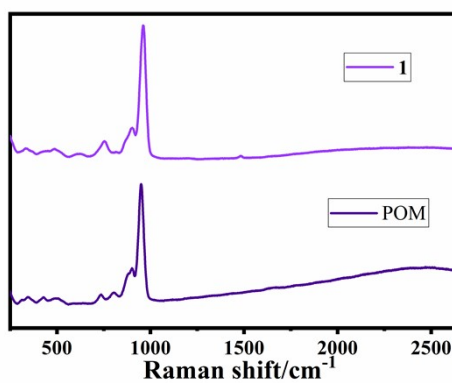

**Fig. S5.** Raman spectra of **1** and  $\text{K}_{14}[\text{As}_2\text{W}_{19}\text{O}_{67}(\text{H}_2\text{O})]$ .

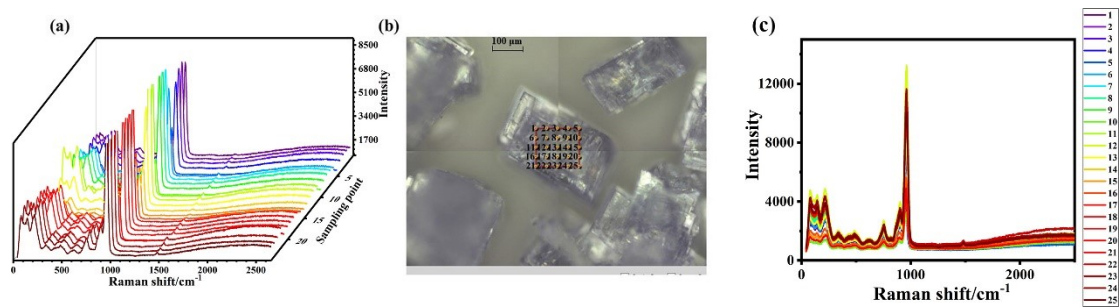

**Fig. S6.** (a) (c) Raman spectra at different positions on the crystal of **1**. (b) The number represent the sampling point on the crystal of **1**.

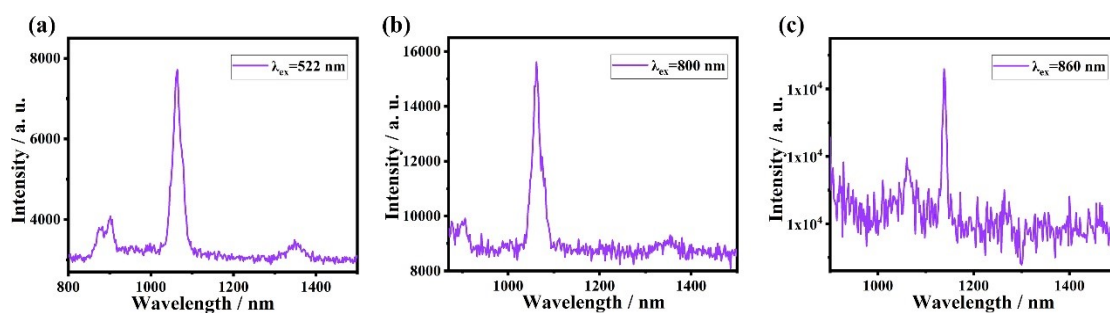

**Fig. S7.** The emission spectra of **1** by monitoring the excitation at 522 nm (a), 800 nm (b), and 860 nm (c), respectively.

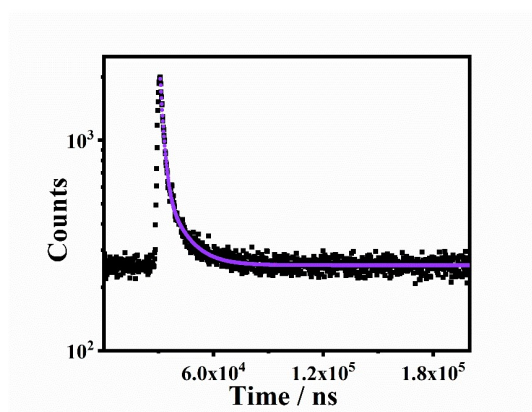

**Fig. S8.** The luminescence decay curve of **1** by monitoring the emission at 1059 nm upon the excitation at 580 nm.

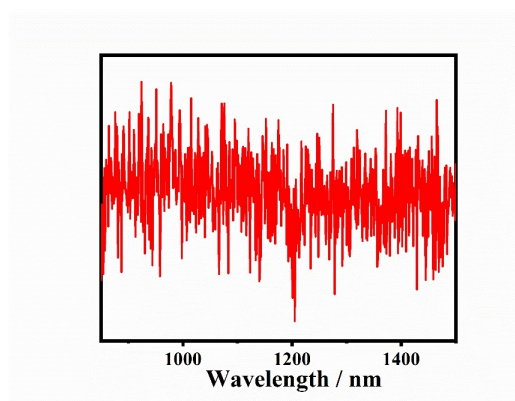

**Fig. S9.** The emission spectrum of  $K_{14}[As_2W_{19}O_{67}(H_2O)]$  by monitoring the excitation at 580 nm.

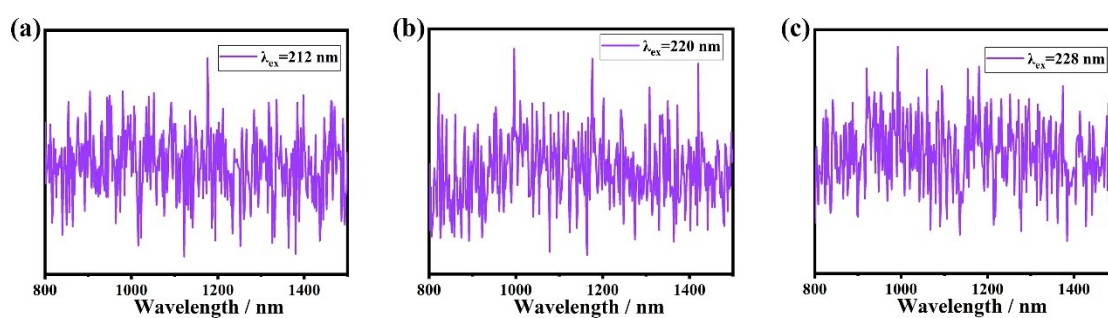

**Fig. S10.** The emission spectra of **1** by monitoring the excitation under 212, 220 and 228 nm, respectively.

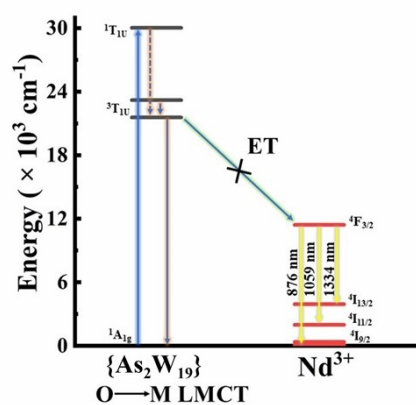

**Fig. S11.** The schematic energy level diagram demonstrating the mismatch of the energy gap between  ${}^3T_{1u} \rightarrow {}^1A_{1g}$  of  $\{As_2W_{19}\}$  components and  ${}^4F_{3/2} \rightarrow {}^4I_J$  ( $J=13/2, 11/2,$  and  $9/2$ ) of  $Nd^{III}$  cations in **1**. (dotted line denotes nonradiative transition, ET: energy transfer).

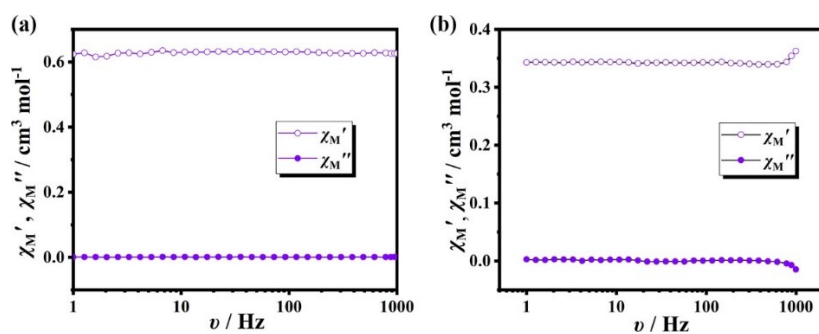

**Fig. S12.** Frequency dependence of  $\chi_M'$  (closed circles) and  $\chi_M''$  (open circles) for **1** and **1@Y** measured under zero dc field at 2.0 K.

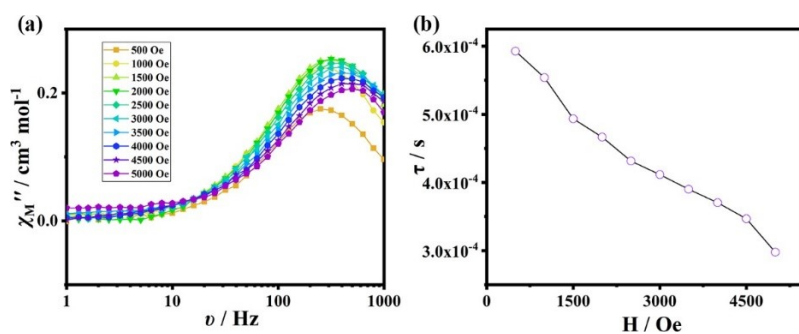

**Fig. S13.** Sweep field diagram of **1** from 500 to 5000 Oe, and the field-dependent relaxation time for **1** at 2.0 K.

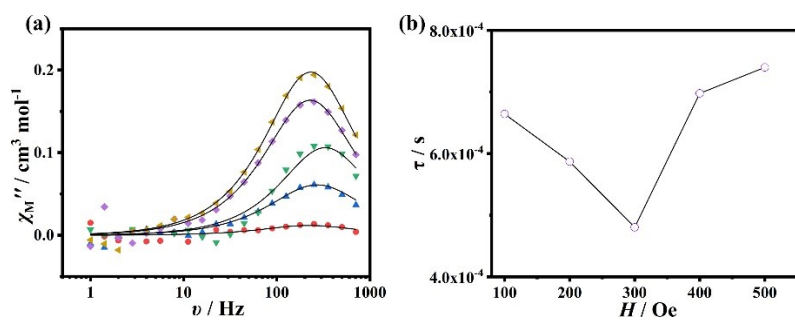

**Fig. S14.** Sweep field diagram of **1** from 100 to 500 Oe at 2.0 K.

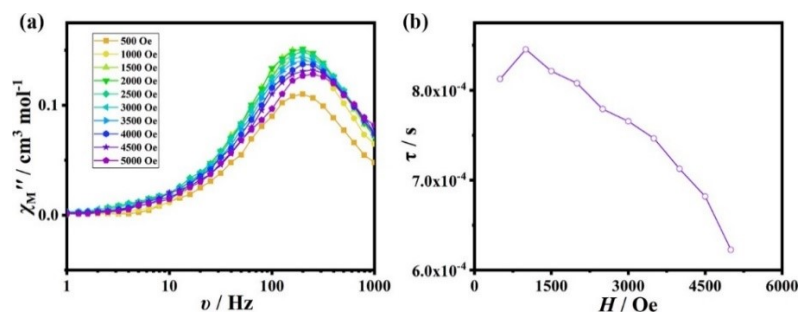

**Fig. S15.** Sweep field diagram of **1@Y** from 500 to 5000 Oe, and the field-dependent relaxation time for **1@Y** at 2.0 K.

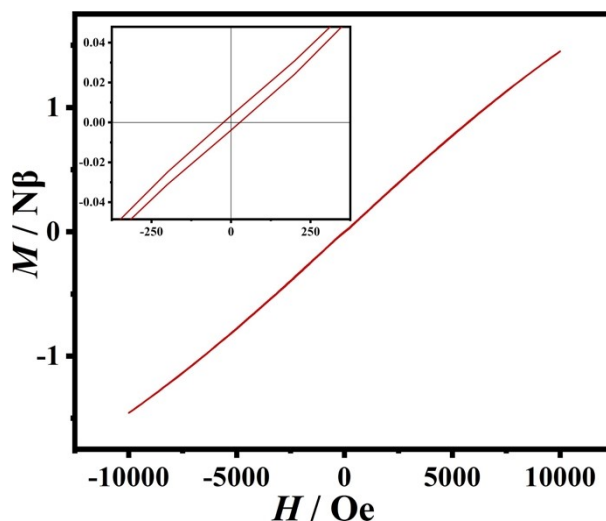

**Fig. S16.** Hysteresis loop for **1**, collected at 2 K with a 500 Oe  $s^{-1}$  sweep rate. Inset: expansion showing the very small coercivity (left top).

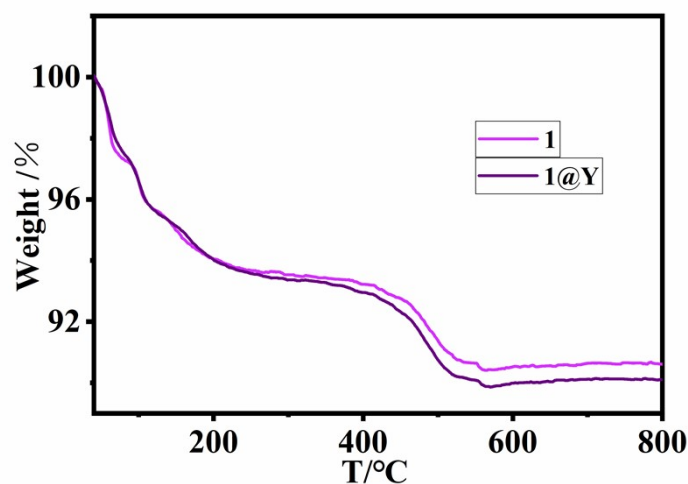

**Fig. S17.** TG curves of **1** and **1@Y**.

The thermal stability of **1** and **1@Y** have been determined by thermal gravimetric analysis (Fig. S17). The TG curves of **1** and **1@Y** exhibit two steps of weight loss in the range of 28–800°C. For **1**, the first stage at 28–167°C corresponds to the loss of the lattice water molecules. From 440 to 529°C, the TG trace showed a weight loss of 2.84%, corresponding to the loss of six coordinate water molecules, the dehydration of four protons, organic moieties and the decomposition of the metal-oxo cluster. For **1@Y**, the first weight loss of 6.27% from 28 to 172°C is attributed to the loss of all lattice water molecules. The second weight loss is from 439 to 510°C with a value of 3.36%, which is assigned to the six coordinate water molecules, the dehydration of four protons, accompanied with the decomposition of the polyoxoanions.



**Table S1.** Crystallographic data and structure refinements for **1** and **1@Y**.

|                                                                             | <b>1</b>                                                                                                                         | <b>1@Y</b>                                                                                                           |
|-----------------------------------------------------------------------------|----------------------------------------------------------------------------------------------------------------------------------|----------------------------------------------------------------------------------------------------------------------|
| Empirical formula                                                           | C <sub>2</sub> H <sub>140</sub> As <sub>4</sub> K <sub>14</sub> Na <sub>6</sub> Nd <sub>2</sub> O <sub>208</sub> W <sub>38</sub> | C <sub>2</sub> H <sub>118</sub> As <sub>4</sub> K <sub>14</sub> Na <sub>6</sub> NdO <sub>197</sub> W <sub>38</sub> Y |
| Formula weight                                                              | 11752.41                                                                                                                         | 11498.91                                                                                                             |
| Temperature / K                                                             | 150                                                                                                                              | 150                                                                                                                  |
| Crystal system                                                              | triclinic                                                                                                                        | triclinic                                                                                                            |
| Space group                                                                 | <i>P</i> -1                                                                                                                      | <i>P</i> -1                                                                                                          |
| <i>a</i> [Å]                                                                | 12.334(2)                                                                                                                        | 12.2749(4)                                                                                                           |
| <i>b</i> [Å]                                                                | 18.595(4)                                                                                                                        | 18.6068(6)                                                                                                           |
| <i>c</i> [Å]                                                                | 23.017(3)                                                                                                                        | 22.8952(7)                                                                                                           |
| $\alpha$ [°]                                                                | 67.230(6)                                                                                                                        | 67.2420(10)                                                                                                          |
| $\beta$ [°]                                                                 | 81.027(4)                                                                                                                        | 81.1630(10)                                                                                                          |
| $\gamma$ [°]                                                                | 79.984(6)                                                                                                                        | 79.5700(10)                                                                                                          |
| <i>V</i> [Å <sup>3</sup> ]                                                  | 4770.9(14)                                                                                                                       | 4722.2(3)                                                                                                            |
| <i>Z</i>                                                                    | 1                                                                                                                                | 1                                                                                                                    |
| $\rho_{\text{calcd}}$ [g cm <sup>-3</sup> ]                                 | 3.911                                                                                                                            | 3.840                                                                                                                |
| $\mu$ [mm <sup>-1</sup> ]                                                   | 24.449                                                                                                                           | 24.725                                                                                                               |
| <i>F</i> (000)                                                              | 4904.0                                                                                                                           | 4735.0                                                                                                               |
| Index ranges                                                                | -14 ≤ <i>h</i> ≤ 14                                                                                                              | -14 ≤ <i>h</i> ≤ 13                                                                                                  |
|                                                                             | -22 ≤ <i>k</i> ≤ 22                                                                                                              | -22 ≤ <i>k</i> ≤ 22                                                                                                  |
|                                                                             | -27 ≤ <i>l</i> ≤ 25                                                                                                              | -27 ≤ <i>l</i> ≤ 27                                                                                                  |
| Reflections collected                                                       | 59966                                                                                                                            | 59535                                                                                                                |
| Independent reflections                                                     | 16950                                                                                                                            | 16757                                                                                                                |
|                                                                             | [ <i>R</i> <sub>int</sub> = 0.0504]                                                                                              | [ <i>R</i> <sub>int</sub> = 0.0556]                                                                                  |
| data/restraints/<br>parameters                                              | 16950/ 96/ 1154                                                                                                                  | 16757/ 84/ 1068                                                                                                      |
| Goodness-of-fit on <i>F</i> <sup>2</sup>                                    | 1.024                                                                                                                            | 1.032                                                                                                                |
| <i>R</i> <sub>1</sub> , <i>wR</i> <sub>2</sub> [ <i>I</i> > 2σ( <i>I</i> )] | 0.0442, 0.1124                                                                                                                   | 0.0516, 0.1212                                                                                                       |
| <i>R</i> <sub>1</sub> , <i>wR</i> <sub>2</sub> [all data]                   | 0.0530, 0.1190                                                                                                                   | 0.0616, 0.1271                                                                                                       |
| Largest diff. Peak/hole/e<br>Å <sup>-3</sup>                                | 2.85/-1.92                                                                                                                       | 5.27/-3.75                                                                                                           |

**Table S2** BVS values for Nd, As, and W atoms in **1**.

| Atoms | BVS value | Atoms | BVS value | Atoms | BVS value |
|-------|-----------|-------|-----------|-------|-----------|
| Nd1   | 3.03      | W6    | 5.93      | W14   | 5.99      |
| As1   | 2.92      | W7    | 5.87      | W15   | 5.98      |
| As2   | 2.86      | W8    | 6.04      | W16   | 6.00      |
| W1    | 6.14      | W9    | 6.09      | W17   | 6.04      |

|    |      |     |      |     |      |
|----|------|-----|------|-----|------|
| W2 | 6.07 | W10 | 6.08 | W18 | 6.18 |
| W3 | 6.09 | W11 | 6.08 | W19 | 6.00 |
| W4 | 6.01 | W12 | 6.23 |     |      |
| W5 | 5.91 | W13 | 6.05 |     |      |

**Table S3** Possible geometries of eight coordinated metal centers.

| geometry | point group | polyhedron                                   |
|----------|-------------|----------------------------------------------|
| OP-8     | $D_{8h}$    | Octagon                                      |
| HPY-8    | $C_{7v}$    | Heptagonal pyramid                           |
| HBPY-8   | $D_{6h}$    | Hexagonal bipyramid                          |
| CU-8     | $O_h$       | Cube                                         |
| SAPR-8   | $D_{4d}$    | Square antiprism                             |
| TDD-8    | $D_{2d}$    | Triangular dodecahedron                      |
| JGBF-8   | $D_{2d}$    | Johnson gyrobifastigium (J26)                |
| JETBPY-8 | $D_{3h}$    | Johnson elongated triangular bipyramid (J14) |
| JBTPR-8  | $C_{2v}$    | Biaugmented trigonal prism (J50)             |
| BTPR-8   | $C_{2v}$    | Biaugmented trigonal prism                   |
| JSD-8    | $D_{2d}$    | Snub diphenoïd(J84)                          |
| TT-8     | $T_d$       | Triakis tetrahedron                          |
| ETBPY-8  | $D_{3h}$    | Elongated trigonal bipyramid                 |

**Table S4** Deviation parameters calculated by SHAPE from each ideal polyhedron for Nd1.

|          | Nd1    |
|----------|--------|
| OP-8     | 32.186 |
| HPY-8    | 20.820 |
| HBPY-8   | 14.644 |
| CU-8     | 13.345 |
| SAPR-8   | 4.852  |
| TDD-8    | 3.896  |
| JGBF-8   | 12.938 |
| JETBPY-8 | 27.691 |
| JBTPR-8  | 3.530  |
| BTPR-8   | 2.664  |
| JSD-8    | 5.982  |
| TT-8     | 14.130 |
| ETBPY-8  | 22.036 |

**Table S5** Selected bond angles (°) of **1**.

| Bond        | Angle    | Bond        | Angle    |
|-------------|----------|-------------|----------|
| O42-Nd1-O3W | 134.9(4) | O63-Nd1-O3W | 134.9(4) |
| O51-Nd1-O42 | 70.8(3)  | O68-Nd1-O42 | 70.6(3)  |
| O51-Nd1-O63 | 152.0(3) | O68-Nd1-O69 | 64.8(3)  |
| O51-Nd1-O68 | 72.2(3)  | O68-Nd1-O3W | 73.4(4)  |
| O51-Nd1-O69 | 131.2(3) | O69-Nd1-O42 | 112.7(4) |
| O51-Nd1-O3W | 73.1(3)  | O69-Nd1-O3W | 73.5(4)  |
| O53-Nd1-O42 | 151.4(3) | O2W-Nd1-O42 | 111.6(3) |
| O53-Nd1-O51 | 127.5(3) | O2W-Nd1-O51 | 67.0(3)  |
| O53-Nd1-O63 | 70.7(3)  | O2W-Nd1-O63 | 111.9(3) |
| O53-Nd1-O68 | 132.3(3) | O2W-Nd1-O68 | 134.9(3) |
| O53-Nd1-O69 | 73.5(3)  | O2W-Nd1-O69 | 135.7(4) |
| O53-Nd1-O2W | 66.8(3)  | Nd1-O68-C1  | 120.4(3) |
| O53-Nd1-O3W | 73.6(4)  | Nd1-O69-C1  | 120.5(2) |
| O63-Nd1-O42 | 84.8(3)  | O68-C1-C1   | 117.0(4) |
| O63-Nd1-O68 | 113.2(3) | O69-C1-C1   | 116.8(3) |
| O63-Nd1-O69 | 70.6(3)  |             |          |

**Table S6** Selected bond lengths (Å) of **1**.

| Bond    | Length    |
|---------|-----------|
| Nd1-O51 | 2.463(9)  |
| Nd1-O42 | 2.490(10) |
| Nd1-O2W | 2.460(10) |
| Nd1-O63 | 2.468(10) |
| Nd1-O53 | 2.421(10) |
| Nd1-O69 | 2.492(10) |
| Nd1-O3W | 2.516(11) |
| Nd1-O68 | 2.500(10) |
| As1-O21 | 1.800(8)  |
| As1-O26 | 1.810(9)  |
| As1-O44 | 1.786(9)  |
| As2-O20 | 1.812(9)  |
| As2-O23 | 1.821(9)  |
| As2-O36 | 1.785(10) |

**Table S7** Calculated and found analyses of As, W, Nd and Y with massic ratios in **1** and **1@Y**.

|       | sample | As (%) | W (%) | Nd (%) | Y (%) |
|-------|--------|--------|-------|--------|-------|
| calcd | 1      | 2.55   | 59.42 | 2.45   | 0     |
|       | 1@Y    | 2.61   | 60.73 | 1.25   | 0.77  |
| found | 1      | 2.65   | 62.07 | 2.68   | 0     |
|       | 1@Y    | 2.61   | 62.96 | 1.27   | 0.74  |

**Table S8** Relaxation fitting parameters from least-squares fitting of  $\chi(\omega)$  data of **1**.

| T / K | $\chi_t$ | $\chi_s$ | $\tau / s$ | $\alpha$ |
|-------|----------|----------|------------|----------|
| 1.8   | 1.212    | 0.778    | 7.502E-4   | 0.030    |
| 1.9   | 1.205    | 0.785    | 6.566E-4   | 0.022    |
| 2.0   | 1.206    | 0.794    | 6.015E-4   | 0.026    |
| 2.1   | 1.146    | 0.754    | 5.212E-4   | 0.023    |
| 2.2   | 1.138    | 0.762    | 4.731E-4   | 0.026    |
| 2.3   | 1.138    | 0.762    | 4.101E-4   | 0.051    |
| 2.4   | 1.125    | 0.775    | 3.937E-4   | 0.030    |
| 2.5   | 1.117    | 0.783    | 3.602E-4   | 0.027    |
| 2.6   | 1.106    | 0.794    | 3.417E-4   | 0.016    |
| 2.7   | 1.102    | 0.798    | 3.070E-4   | 0.019    |
| 2.8   | 1.094    | 0.806    | 2.866E-4   | 0.005    |
| 2.9   | 1.090    | 0.810    | 2.632E-4   | 0.010    |
| 3.0   | 1.085    | 0.815    | 2.451E-4   | 0.020    |
| 3.2   | 1.077    | 0.823    | 2.116E-4   | 0.027    |
| 3.4   | 1.067    | 0.833    | 1.841E-4   | 0.013    |

**Table S9** Relaxation fitting parameters from least-squares fitting of  $\chi(\omega)$  data of **1@Y**.

| T / K | $\chi_t$ | $\chi_s$ | $\tau / s$ | $\alpha$ |
|-------|----------|----------|------------|----------|
| 1.8   | 1.408    | 0.981    | 0.00142    | 0.063    |
| 1.9   | 1.400    | 0.992    | 0.00124    | 0.059    |
| 2.0   | 1.374    | 0.993    | 0.00109    | 0.048    |
| 2.1   | 1.358    | 1.000    | 9.410E-4   | 0.060    |
| 2.2   | 1.344    | 1.001    | 8.265E-4   | 0.057    |
| 2.3   | 1.330    | 1.003    | 7.548E-4   | 0.054    |
| 2.4   | 1.310    | 1.003    | 6.900E-4   | 0.041    |
| 2.5   | 1.295    | 1.004    | 6.264E-4   | 0.029    |
| 2.6   | 1.282    | 1.005    | 5.724E-4   | 0.027    |
| 2.7   | 1.267    | 1.006    | 5.261E-4   | 0.011    |
| 2.8   | 1.266    | 1.007    | 4.815E-4   | 0.023    |
| 2.9   | 1.260    | 1.010    | 4.512E-4   | 0.020    |
| 3.0   | 1.254    | 1.011    | 4.260E-4   | 0.023    |
| 3.2   | 1.245    | 1.021    | 3.488E-4   | 0.008    |
| 3.4   | 1.244    | 1.032    | 3.005E-4   | 0.012    |
